# Supplementary material for: Which protocol for prostate biopsies in patients with a positive MRI? Interest of systematic biopsies by sectors.
Source: Research Square preprint supplement (doi:10.21203/rs.3.rs-3209559/v1), 2023-08-11
Supplement: Supplementary file 1 [file 23ab6eb6b85864db252c43c0.xlsx]

## Sheet: Feuil1
Table 3: uni- and multivariate analysis according the added
value of SBx in the diagnosis of csPCa.
	Univariate analysis			Multivariate analysis
Explanatory	OR	CI95%	p-value	OR	CI95%	p-value
Age	1.02	0.97-1.07	0.416
PB history	1.12	0.70-1.77	0.624
PSA	1.00	0.93-1.07	0.938
PSAD	0.83	0.07-5.90	0.872
Anormal DRE	1.00	0.58-1.63	0.999
Volume	1.00	0.98-1.00	0.401
Lesion size	0.94	0.88-1.00	0.051	0.96	0.89-1.03	0.298
PI-RADS score
3	ref	ref	ref	ref	ref	ref
4	1.09	0.51-2.33	0.829	1.58	0.65-3.94	0.317
5	0.47	0.27-0.79	0.005	0.56	0.29-1.05	0.076
N SBx core	1.12	0.72-1.58	0.536
N TBx core	0.65	0.46-0.91	0.015	0.56	0.38-0.82	0.003
N core	0.80	0.59-1.05	0.131
PSA = prostate specific antigen; PSAD = PSA density; DRE = digital rectal examination: PI-RADS = Prostate Imaging Reporting and Data System; SBx = systematic biopsy; TBx = targeted biopsy
