# Supplementary material for: Which protocol for prostate biopsies in patients with a positive MRI? Interest of systematic biopsies by sectors.
Source: Research Square preprint supplement (doi:10.21203/rs.3.rs-3209559/v1), 2023-08-11
Supplement: Supplementary file 2 [file c11a1f2e5b895d6bd36eb39a.xlsx]

## Sheet: Feuil1
Table 2: Added value of targeted biopsy, systematic biopsies and systematic biopsies regarding
to the lesion location, according to the PI-RADS score.
			PI-RADS 3		PI-RADS 4		PI-RADS 5		p-value2
Biopsy location	Overall (N = 428)1		(N = 117)1		(N = 191)1		(N = 120)1
	csPCa	Added value	csPCa	Added value	csPCa	Added value	csPCa	Added value
SBx + TBx	225 (53)	Reference	28 (24)		106 (55)		91 (76)
TBx	183 (43)	50 (12)	22 (19)	8 (6.8)	78 (41)	24 (13)	83 (69)	18 (15)	0.13
SBx	176 (41)	43 (10)	21 (18)	7 (6.0)	82 (43)	28 (15)	73 (61)	8 (6.7)	0.017
S-SBx	133 (31)	22 (5.1)	17 (15)	4 (3.4)	55 (29)	13 (6.8)	61 (51)	5 (4.2)	0.4
A-SBx	104 (24)	24 (5.6)	10 (8.5)	2 (1.7)	46 (24)	15 (7.9)	48 (40)	7 (5.8)	0.075
I-SBx	95 (22)	21 (4.9)	7 (6.0)	1 (0.9)	39 (20)	13 (6.8)	49 (41)	7 (5.8)	0.055
C-SBx	40 (9.3)	9 (2.1)	6 (5.1)	2 (1.7)	16 (8.4)	6 (3.1)	18 (15)	1 (0.8)	0.4
1 Statistics presented: n (%)
2 Statistical tests performed: chi-square test of independence
SBx = systematic biopsy; TBx = targeted biopsy; S-SBx = same sextant SBx; A-SBx = adjacent sextant; I-SBx = ipsilateral side; C-SBx = contralateral side
