# Supplementary material for: Which protocol for prostate biopsies in patients with a positive MRI? Interest of systematic biopsies by sectors.
Source: Research Square preprint supplement (doi:10.21203/rs.3.rs-3209559/v1), 2023-08-11
Supplement: Supplementary file 3 [file da7fff40703c993876158e38.xlsx]

## Sheet: Feuil1
Table 1: Patients’ characteristics with clinically significant prostate cancer detected
by the added value of systematics prostate biopsies.
Characteristics	Overall,	No,	Yes,	p-value2
	N = 4281	N = 3851	N = 431
Age	67 (63, 71)	67 (62, 71)	68 (63, 71)	0.6
History of PBx	158 (37)	141 (37)	17 (40)	0.7
Unknown	1	0	1
Anormal DRE	109 (26)	98 (26)	11 (26)	>0.9
Unknown	2	2	0
Indication				0.9
Biopsy Naïve	285 (67)	258 (67)	27 (63)
Restaging	20 (4.7)	18 (4.7)	2 (4.7)
Active surveillance	37 (8.6)	33 (8.6)	4 (9.3)
Previous negative biopsy	86 (20)	76 (20)	10 (23)
PSA	7.0 (5.5, 9.4)	7.0 (5.5, 9.6)	6.5 (5.6, 8.7)	0.5
Unknown	1	1	0
PSAD	0.13 (0.09, 0.21)	0.13 (0.09, 0.21)	0.15 (0.10, 0.20)	0.4
Unknown	1	1	0
Volume	50 (38, 70)	50 (38, 70)	45 (36, 62)	0.4
Zone				0.041
Peripheral posterior	329 (77)	295 (77)	34 (81)
Peripheral anterior	38 (8.9)	32 (8.3)	6 (14)
Transitional	42 (9.8)	42 (11)	0 (0)
SFMA	18 (4.2)	16 (4.2)	2 (4.8)
Unknown	1	0	1
Lesion size	11 (8, 16)	11 (8, 16)	8 (6, 13)	0.021
Unknown	48	45	3
PI-RADS				0.017
3	117 (27)	110 (29)	7 (16)
4	191 (45)	163 (42)	28 (65)
5	120 (28)	112 (29)	8 (19)
N SBx core	12.2 (0.70)	12.2 (0.73)	12.3 (0.71)	0.62
Unknown	1	1	0
N TBx core	3.65 (1.0)	3.68 (0.96)	3.3 (0.99)	0.008
Unknown	1	1	0
N total core	15.87 (1.25)	15.90 (1.24)	15.60 (1.26)	0.070
1 Statistics presented: Median (IQR); n (%)
2 Statistical tests performed: Wilcoxon rank-sum test; chi-square test of independence; Fisher's exact test
PBx = prostate biopsy; DRE = digital rectal examination; PSA = prostate specific antigen; PSAD = PSAD density; PI-RADS = Prostate Imaging Reporting and Data System; SBx = standard PBx; TBx = targeted PBx
